# Supplementary material
Source: Springer Nature journal article supplement (https://www.springermedizin.de/resource/supplementary/12916_2006_111_MOESM1_ESM.pdf/9599192)

## SEARCH STRATEGY

Electronic literature search in Medline, Embase, Cochrane and DARE combining terms (Pregnancy, maternal, gestation OR Obstetrics) AND (medicine OR complication OR medication) AND (systematic review OR meta-analysis)

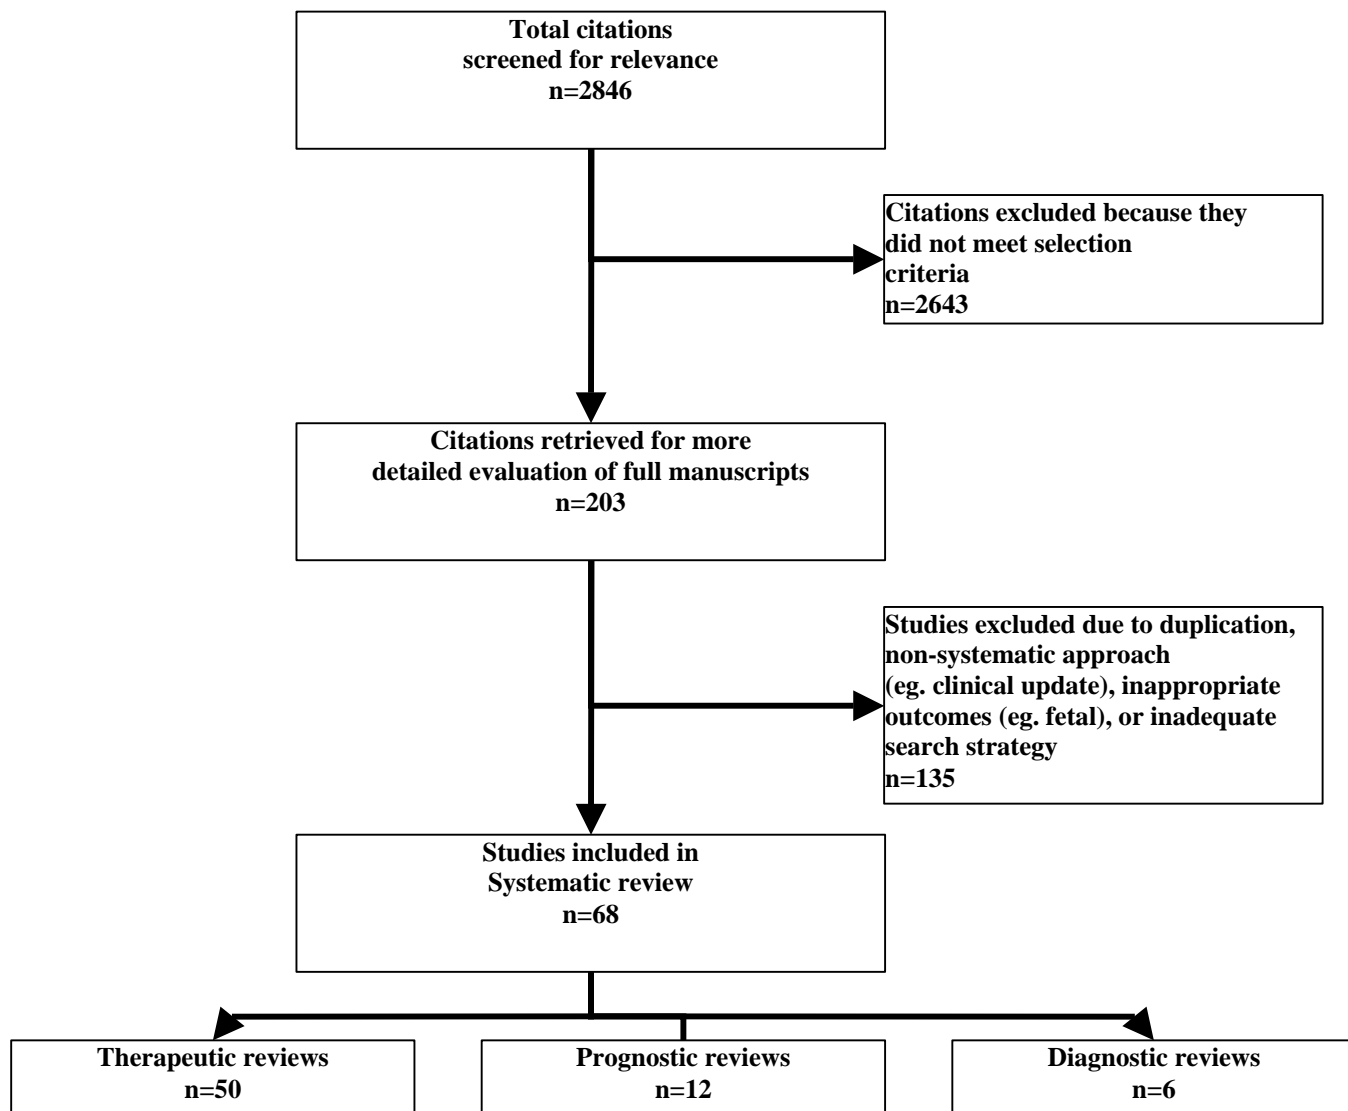

Supplement: MOESM1 [file 9599192]
